# Supplementary material
Source: HighWire-hosted journal article supplement (https://bjgp.org/highwire/filestream/39619/field_highwire_adjunct_files/0/bjgp20X712589_Suppl.pdf)
Supplement: bjgp20X712589_Suppl.pdf [file bjgp20X712589_Suppl.pdf]

**Schedule 3** Ibuprofen (20mg/kg/day), max 3 days. Give **either** syrup **or** tablets **or** suppositories

| Tick: | Weight of child in kg | Syrup (20 mg/ml) | Tablets (in the mouth)         | Suppositories (in the bottom) |
|-------|-----------------------|------------------|--------------------------------|-------------------------------|
|       | 9-11                  | 3-4 times 2 ml   |                                |                               |
|       | 12-15                 | 3-4 times 3 ml   |                                |                               |
|       | 16-19                 | 3-4 times 4 ml   |                                |                               |
|       | 20-23                 | 3-4 times 5 ml   | 3-4 times 1 tablet of 100 mg   |                               |
|       | 24 kg                 | 3-4 times 6 ml   | 3-4 times 1 tablet of 100 mg   |                               |
|       | 25-29                 |                  | 3-4 times 1 tablet of 100 mg   | 3-4 times 1 supp of 125 mg    |
|       | 30-39                 |                  | 3-4 times 1.5 tablet of 100 mg | 3-4 times 1 supp of 125 mg    |
|       | 40-49                 |                  | 3-4 times 1 tablet of 200 mg   | 3-4 times 1 supp of 125 mg    |

supp: suppository

**If your child doesn't recover despite the treatment**

If you are worried, because your son or daughter doesn't recover despite the treatment, feels drowsy or doesn't drink well, or if the earache gets worse or isn't gone after three days, you should contact your GP again.

**Finally**

More information about middle ear infection can be found on [www.thuisarts.nl](http://www.thuisarts.nl). The dosages for children in this leaflet are taken from the pharmacotherapeutic guideline for pain control ("Farmacotherapeutische richtlijn Pijnbestrijding") published by the Dutch College of General Practitioners (NHG). This leaflet is not a package insert. You can obtain more information about the medication at your pharmacy, or read more at [www.consumed.nl](http://www.consumed.nl).

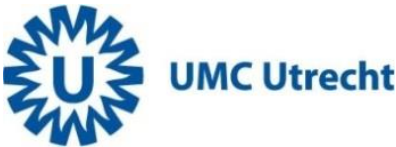

**PIM-POM study team**  
Prof. Roger Damoiseaux PhD, general practitioner, Prof. Anne Schilder PhD, ENT specialist, Roderick Venekamp PhD, general practitioner, and Rick van Uum MD, GP in training

# PIM-POM STUDY

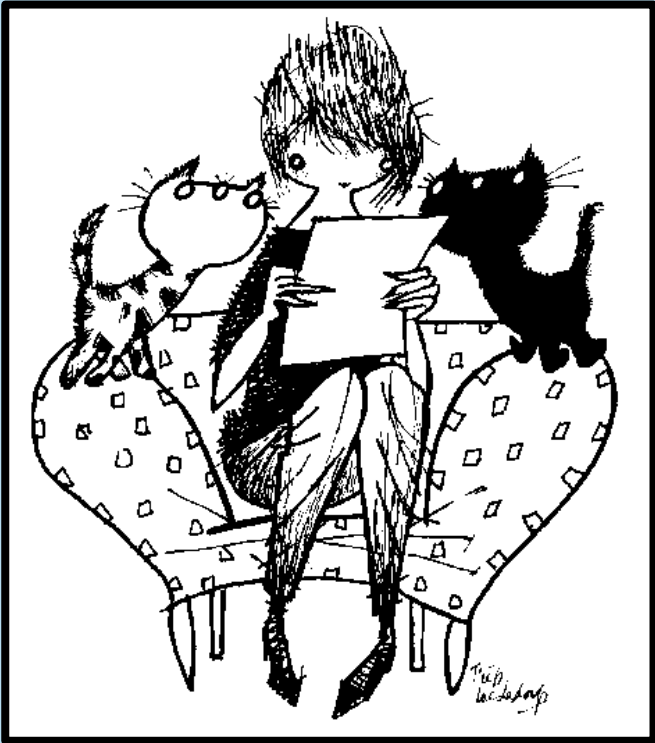

©Fiep Amsterdam bv; Fiep Westendorp Illustrations. These are the cats Pim and Pom. For more information, visit the website: [www.pimnpom.nl](http://www.pimnpom.nl)

**Information leaflet about pain relief  
for children with middle ear infection**

## Introduction

Your GP has diagnosed your son or daughter with a middle ear infection. A middle ear infection can be very painful. The worst symptoms usually subside in two to three days. In children under the age of two, symptoms can last up to a week. The GP has given you a prescription for pain medication. In this leaflet we explain how best to give this pain medication to your child.

## Paracetamol

Paracetamol alleviates the earache and suppresses the fever. It will start to work after 15 to 30 minutes, and will have an effect for 3 to 5 hours. Please wait at least 4 hours before giving the next dose of paracetamol, and at least 6 hours when you use a paracetamol suppository. Paracetamol is available as a tablet, syrup or suppository. Tablets or syrup are preferred, because paracetamol is absorbed better that way. In the first three days of the middle ear infection, it's important to give paracetamol to your child in a high dosage, following schedule 1. After three days, you decrease the dosage of paracetamol by switching to schedule 2.

## Ibuprofen

For children older than 1 year with earache despite paracetamol according to schedule 1 or 2, ibuprofen may additionally be offered. Ibuprofen is stronger pain medication, which reduces the inflammation of the ear and suppresses the fever. It will start to work after 30 to 60 minutes and will have an effect for 8 hours. Wait at least 6 hours before giving the next dose of ibuprofen. Ibuprofen should **never** be given for more than three consecutive days. You will find the dosage of ibuprofen on the next page in schedule 3.

## Facts about pain medicine

It's important that you give your child pain medication regularly, as instructed. This way, the amount of pain medication in the blood remains stable and the pain is reduced evenly. So don't wait until your child has an earache again, but give the next dose in time. This will also help to prevent your child waking up at night because of the pain. During the first three days, give the standard dose of paracetamol 4 to 6 times a day as a syrup **or** using tablets, **or** give a suppository 3 times a day (see schedule 1). Then gradually decrease the dosage.

## Myths about pain medicine

- 'If I give painkillers too often, it will be less effective.' This is **not** true. Your child cannot become 'insensitive' to pain medicines and they are not addictive.
- 'I will save the pain medication for bedtime in the evening, that's when my child really needs it.' It's true that in most children the earache worsens in the evening; in the dark there's less distraction so the pain is more notable. But it's just as important to alleviate the pain during the day.

**Schedule 1** Paracetamol (90mg/kg/day), **max** 3 days. Give **either** syrup **or** tablets **or** suppositories

| Tick: | Weight of child in kg | Syrup (24 mg/ml) | Tablets (in the mouth)         | Suppositories (in the bottom)    |
|-------|-----------------------|------------------|--------------------------------|----------------------------------|
|       | 7                     | 4-6 times 4 ml   |                                | 3 times 1 suppository of 120 mg  |
|       | 8-9                   | 4-6 times 5 ml   |                                | 3 times 1 suppository of 240 mg  |
|       | 10-11                 | 4-6 times 6 ml   |                                | 3 times 1 suppository of 240 mg  |
|       | 12                    | 4-6 times 7 ml   |                                | 3 times 1 suppository of 240 mg  |
|       | 13-14                 | 4-6 times 8 ml   |                                | 3 times 1 suppository of 240 mg  |
|       | 15                    | 4-6 times 9 ml   | 4-6 times 1.5 tablet of 120 mg | 3 times 1 suppository of 240 mg  |
|       | 16                    | 4-6 times 10 ml  | 4-6 times 1.5 tablet of 120 mg | 3 times 1 suppository of 240 mg  |
|       | 17                    | 4-6 times 10 ml  | 4-6 times 1 tablet of 250 mg   | 3 times 1 suppository of 500 mg  |
|       | 18-19                 | 4-6 times 11 ml  | 4-6 times 1 tablet of 250 mg   | 3 times 1 suppository of 500 mg  |
|       | 20-24                 |                  | 4-6 times 1 tablet of 250 mg   | 3 times 1 suppository of 500 mg  |
|       | 25-33                 |                  | 4-6 times 1.5 tablet of 250 mg | 3 times 1 suppository of 500 mg  |
|       | 34-49                 |                  | 4-6 times 1 tablet of 500 mg   | 3 times 1 suppository of 1000 mg |

**Schedule 2** Paracetamol (60mg/kg/day), **after** 3 days. Give **either** syrup **or** tablets **or** suppositories

| Tick: | Weight of child in kg | Syrup (24 mg/ml) | Tablets (in the mouth)         | Suppositories (in the bottom)   |
|-------|-----------------------|------------------|--------------------------------|---------------------------------|
|       | 7                     | 4-6 times 2 ml   |                                | 3 times 1 suppository of 120 mg |
|       | 8-9                   | 4-6 times 3 ml   |                                | 3 times 1 suppository of 120 mg |
|       | 10-11                 | 4-6 times 4 ml   |                                | 3 times 1 suppository of 120 mg |
|       | 12-14                 | 4-6 times 5 ml   |                                | 3 times 1 suppository of 240 mg |
|       | 15-16                 | 4-6 times 6 ml   | 4-6 times 1.5 tablet of 100 mg | 3 times 1 suppository of 240 mg |
|       | 17-19                 | 4-6 times 7 ml   | 4-6 times 1.5 tablet of 100 mg | 3 times 1 suppository of 240 mg |
|       | 20-21                 | 4-6 times 8 ml   | 4-6 times 1.5 tablet of 100 mg | 3 times 1 suppository of 240 mg |
|       | 22-23                 | 4-6 times 9 ml   | 4-6 times 1.5 tablet of 100 mg | 3 times 1 suppository of 240 mg |
|       | 24                    | 4-6 times 10 ml  | 4-6 times 1.5 tablet of 100 mg | 3 times 1 suppository of 240 mg |
|       | 25-37                 |                  | 4-6 times 1 tablet of 250 mg   | 3 times 1 suppository of 500 mg |
|       | 38-49                 |                  | 4-6 times 1.5 tablet of 250 mg | 3 times 1 suppository of 500 mg |

**TABLE S1. ADDITIONAL BASELINE CHARACTERISTICS**

| Characteristic                 | Intervention (n=94) | Usual care (n=129) |
|--------------------------------|---------------------|--------------------|
| Symptoms prior to consultation |                     |                    |
| Runny nose*                    | 68 (82.9)           | 90 (81.1)          |
| Number of days <sup>†</sup>    | 5 (3.5-6.5)         | 7 (5.5-8.5)        |
| Cough*                         | 53 (64.6)           | 76 (67.9)          |
| Number of days <sup>†</sup>    | 5 (3.5-6.5)         | 7 (5.5-8.5)        |
| Sleep disturbance              | 69 (84.1)           | 92 (82.9)          |
| Number of days <sup>†</sup>    | 2 (1-3)             | 4 (2-6)            |
| Diarrhea*                      | 14 (17.1)           | 22 (20.0)          |
| Number of days <sup>†</sup>    | 3 (2-4)             | 3 (2-4)            |
| Constipation*                  | 5 (6.1)             | 5 (4.5)            |
| Number of days <sup>†</sup>    | 2 (0-4)             | 2.5 (0.5-4.5)      |
| Vomiting*                      | 13 (15.9)           | 27 (24.5)          |
| Number of days <sup>†</sup>    | 2 (1.5-2.5)         | 1 (0.5-1.5)        |
| Decreased intake*              | 41 (50.0)           | 59 (53.6)          |
| Number of days <sup>†</sup>    | 3 (1.5-4.5)         | 4 (2.5-5.5)        |
| Abdominal pain*                | 19 (23.8)           | 29 (27.1)          |
| Number of days <sup>†</sup>    | 2 (1-3)             | 2 (0.5-3.5)        |
| Rash*                          | 7 (8.5)             | 8 (7.3)            |
| Number of days <sup>†</sup>    | 2 (0.5-3.5)         | 6 (4-8)            |
| Symptoms at baseline           |                     |                    |
| Runny nose*                    | 65 (81.3)           | 90 (81.8)          |
| Cough*                         | 51 (63.0)           | 73 (65.8)          |
| Sleep disturbance*             | 62 (76.5)           | 84 (77.1)          |
| Diarrhea*                      | 8 (9.9)             | 19 (17.4)          |
| Constipation*                  | 3 (3.7)             | 1 (0.9)            |
| Vomiting*                      | 6 (7.4)             | 12 (11.0)          |
| Decreased intake*              | 35 (42.7)           | 60 (55.0)          |
| Abdominal pain*                | 15 (18.8)           | 19 (17.4)          |
| Rash*                          | 6 (7.5)             | 6 (5.5)            |

All values are numbers with percentages, unless stated otherwise

<sup>†</sup> median with IQR, <sup>‡</sup> mean with SD

\*missings: prior to consultation (29-36), at baseline (31-34).

**TABLE S2. CO-MEDICATION USED IN FIRST THREE DAYS**

|                        | Overall (n=201) <sup>†</sup> | Intervention (n=85) | Usual care (n=116) |
|------------------------|------------------------------|---------------------|--------------------|
| <b>Characteristic</b>  |                              |                     |                    |
| Nasal drops or spray   |                              |                     |                    |
| <i>Sodium chloride</i> | 39 (19.4)                    | 15 (17.6)           | 24 (20.7)          |
| <i>Xylometazoline</i>  | 28 (13.9)                    | 16 (18.8)           | 12 (10.3)          |
| <i>Otrivin</i> ®       | 17 (8.5)                     | 6 (7.1)             | 11 (9.5)           |
| Ear drops              |                              |                     |                    |
| <i>Otalgan</i> ®       | 10 (5.0)                     | 5 (5.9)             | 5 (4.3)            |
| <i>Sofradex</i> ®      | 3 (1.5)                      | 1 (1.2)             | 2 (1.7)            |
| <i>Bacilcoline B</i> ® | 1 (0.5)                      | 0 (0.0)             | 1 (0.9)            |
| <i>Ofloxacin</i> e     | 2 (1.0)                      | 1 (1.2)             | 1 (0.9)            |
| Complementary medicine | 18 (9.0)                     | 10 (11.8)           | 8 (6.9)            |
| Cough syrup            | 6 (3.0)                      | 2 (2.4)             | 4 (3.4)            |

All values are numbers with percentages, unless stated otherwise.

<sup>†</sup> Data available for 90.4% of patients in the intervention group, and 89.9% in the control group.

**TABLE S3. CONSORT 2012 checklist – extension for reporting a cluster randomised trial**

| Section/Topic                                        | Item No | Checklist item                                                                                                                                                                                                                                                                                                                                                                          | Reported on page No |
|------------------------------------------------------|---------|-----------------------------------------------------------------------------------------------------------------------------------------------------------------------------------------------------------------------------------------------------------------------------------------------------------------------------------------------------------------------------------------|---------------------|
| <b>Title and abstract</b>                            |         |                                                                                                                                                                                                                                                                                                                                                                                         |                     |
|                                                      | 1a      | Identification as a cluster randomised trial in the title                                                                                                                                                                                                                                                                                                                               | 1                   |
|                                                      | 1b      | Structured summary of trial design, methods, results, and conclusions                                                                                                                                                                                                                                                                                                                   | 2                   |
| <b>Introduction</b>                                  |         |                                                                                                                                                                                                                                                                                                                                                                                         |                     |
| Background and objectives                            | 2a      | Scientific background and explanation of rationale (for using a cluster design)                                                                                                                                                                                                                                                                                                         | 5-6, protocol       |
|                                                      | 2b      | Specific objectives or hypotheses, including whether objectives pertain to the cluster level, the individual participant level or both                                                                                                                                                                                                                                                  | 5                   |
| <b>Methods</b>                                       |         |                                                                                                                                                                                                                                                                                                                                                                                         |                     |
| Trial design                                         | 3a      | Description of trial design (such as parallel, factorial) including allocation ratio and description of how the design features apply to the clusters                                                                                                                                                                                                                                   | 5-6, protocol       |
|                                                      | 3b      | Important changes to methods after trial commencement (such as eligibility criteria), with reasons                                                                                                                                                                                                                                                                                      | N/A                 |
| Participants                                         | 4a      | Eligibility criteria for participants                                                                                                                                                                                                                                                                                                                                                   | 6                   |
|                                                      | 4b      | Settings and locations where the data were collected                                                                                                                                                                                                                                                                                                                                    | 6-8                 |
| Interventions                                        | 5       | The interventions for each group with sufficient details to allow replication, including how and when they were actually administered, and whether interventions pertain to the cluster level, the individual participant level or both                                                                                                                                                 | 6-7, protocol       |
| Outcomes                                             | 6a      | Completely defined pre-specified primary and secondary outcome measures, including how and when they were assessed and whether outcome measures pertain to the cluster level, the individual participant level or both                                                                                                                                                                  | 8-9                 |
|                                                      | 6b      | Any changes to trial outcomes after the trial commenced, with reasons                                                                                                                                                                                                                                                                                                                   | N/A                 |
| Sample size                                          | 7a      | How sample size was determined, including method of calculation accounting for cluster design                                                                                                                                                                                                                                                                                           | 9                   |
|                                                      | 7b      | When applicable, explanation of any interim analyses and stopping guidelines                                                                                                                                                                                                                                                                                                            | N/A                 |
| Randomisation:                                       |         |                                                                                                                                                                                                                                                                                                                                                                                         |                     |
| Sequence generation                                  | 8a      | Method used to generate the random allocation sequence                                                                                                                                                                                                                                                                                                                                  | 6                   |
|                                                      | 8b      | Type of randomisation; details of any restriction or stratification (such as blocking and block size)                                                                                                                                                                                                                                                                                   | 6                   |
| Allocation concealment mechanism                     | 9       | Mechanism used to implement the random allocation sequence (such as sequentially numbered containers), describing any steps taken to conceal the sequence until interventions were assigned. Specification that allocation was based on clusters rather than individuals and whether allocation concealment (if any) was at the cluster level, the individual participant level or both | 6                   |
| Implementation                                       | 10a     | Who generated the random allocation sequence, who enrolled clusters, and who assigned clusters to interventions                                                                                                                                                                                                                                                                         | 6                   |
|                                                      | 10b     | Mechanism by which individual participants were included in clusters for the purposes of the trial (such as complete enumeration, random sampling)                                                                                                                                                                                                                                      | 7                   |
|                                                      | 10c     | From whom consent was sought (representatives of the cluster, or individual cluster members, or both), and whether consent was sought before or after randomisation                                                                                                                                                                                                                     | 7                   |
| Blinding                                             | 11a     | If done, who was blinded after assignment to interventions (for example, participants, care providers, those assessing outcomes) and how                                                                                                                                                                                                                                                | 6                   |
|                                                      | 11b     | If relevant, description of the similarity of interventions                                                                                                                                                                                                                                                                                                                             | N/A                 |
| Statistical methods                                  | 12a     | Statistical methods used to compare groups for primary and secondary outcomes, and how clustering was taken into account                                                                                                                                                                                                                                                                | 9-10                |
|                                                      | 12b     | Methods for additional analyses, such as subgroup analyses and adjusted analyses                                                                                                                                                                                                                                                                                                        | 9-10                |
| <b>Results</b>                                       |         |                                                                                                                                                                                                                                                                                                                                                                                         |                     |
| Participant flow (a diagram is strongly recommended) | 13a     | For each group, the numbers of participants and clusters who were randomly assigned, received intended treatment, and were analysed for the primary outcome                                                                                                                                                                                                                             | 11, Figure 1        |
|                                                      | 13b     | For each group, losses and exclusions after randomisation for both clusters and individual participants, together with reasons                                                                                                                                                                                                                                                          | 11, Figure 1        |

|                          |     |                                                                                                                                                      |                    |
|--------------------------|-----|------------------------------------------------------------------------------------------------------------------------------------------------------|--------------------|
| Recruitment              | 14a | Dates defining the periods of recruitment and follow-up                                                                                              | 6,8                |
|                          | 14b | Why the trial ended or was stopped                                                                                                                   | N/A                |
| Baseline data            | 15  | A table showing baseline demographic and clinical characteristics for individual and cluster levels in each group                                    | Table 1            |
| Numbers analysed         | 16  | For each group, number of clusters and participants (denominator) included in each analysis and whether the analysis was by original assigned groups | 11, Figure 1       |
| Outcomes and estimation  | 17a | Results at the individual or cluster level as applicable and a coefficient of intracluster correlation (ICC or k) for each primary outcome           | 11-12<br>Table 3   |
|                          | 17b | For binary outcomes, presentation of both absolute and relative effect sizes is recommended                                                          | N/A                |
| Ancillary analyses       | 18  | Results of any other analyses performed, including subgroup analyses and adjusted analyses, distinguishing pre-specified from exploratory            | 11-12<br>Table 3+4 |
| Harms                    | 19  | All important harms or unintended effects in each group (for specific guidance see CONSORT for harms)                                                | 12                 |
| <b>Discussion</b>        |     |                                                                                                                                                      |                    |
| Limitations              | 20  | Trial limitations, addressing sources of potential bias, imprecision, and, if relevant, multiplicity of analyses                                     | 14                 |
| Generalisability         | 21  | Generalisability (external validity, applicability) of the trial findings                                                                            | 14                 |
| Interpretation           | 22  | Interpretation consistent with results, balancing benefits and harms, and considering other relevant evidence                                        | 13-14              |
| <b>Other information</b> |     |                                                                                                                                                      |                    |
| Registration             | 23  | Registration number and name of trial registry                                                                                                       | 2,16               |
| Protocol                 | 24  | Where the full trial protocol can be accessed, if available                                                                                          | 6, REF no. 9       |
| Funding                  | 25  | Sources of funding and other support (such as supply of drugs), role of funders                                                                      | 3,16               |
